# Supplementary material for: Stable layered Ni-rich LiNi0.9Co0.07Al0.03O2 microspheres assembled with nanoparticles as high-performance cathode materials for lithium-ion batteries
Source: Royal Society of Chemistry journal article supplement (doi:10.1039/c6ta09921a), 2017-01-01
Supplement: c6ta09921a1.pdf [file c6ta09921a1.pdf]

## Supporting Information

### Stable Layered Ni-rich $\text{LiNi}_{0.9}\text{Co}_{0.07}\text{Al}_{0.03}\text{O}_2$ Microspheres Assembled with Nanoparticles as High Performance Cathode Material for Lithium-Ion Batteries

Pengfei Zhou, Huanju Meng, Zhen Zhang, Chengcheng Chen, Yanying Lu, Jun Cao, Fangyi Cheng, and Jun Chen\*

**Table S1.** The comparison of electrochemical performance between reported LNCA materials and  $\text{LiNi}_{0.9}\text{Co}_{0.07}\text{Al}_{0.03}\text{O}_2$  in this work.

| Composition                                                                  | 1 <sup>st</sup>         | Cycling capacity at 25 °C |       |           |          | Rate capacity              |       |       | Elevated temperature cycling capacity |        |       |          |
|------------------------------------------------------------------------------|-------------------------|---------------------------|-------|-----------|----------|----------------------------|-------|-------|---------------------------------------|--------|-------|----------|
|                                                                              | discharge               | (mA h g <sup>-1</sup> )   |       |           |          | (C, mA h g <sup>-1</sup> ) |       |       |                                       |        |       |          |
|                                                                              | e                       | curren                    | cycle | reversibl | capacit  |                            |       |       | cycling capacity                      |        |       |          |
|                                                                              | capacity                | t                         | numb  | e         | y        |                            |       |       | (mA h g <sup>-1</sup> )               |        |       |          |
|                                                                              | at 0.1C                 | densit                    | er    | capacity  | retentio | 1                          | 5     | 10    | temperatu                             | curren | Cycle | capacit  |
|                                                                              | (mA h g <sup>-1</sup> ) | y                         |       |           | n        |                            |       |       | re                                    | t      | numb  | y        |
|                                                                              |                         | (mA                       |       |           |          |                            |       |       | (°C)                                  | densit | er    | retentio |
|                                                                              |                         | g <sup>-1</sup> )         |       |           |          |                            |       |       |                                       | y      |       | n        |
| $\text{LiNi}_{0.8}\text{Co}_{0.15}\text{Al}_{0.05}\text{O}_2^1$              | 218                     | 180                       | 100   | 168       | 93%      | 172                        | 137   | 115   | 55                                    | 180    | 100   | 72%      |
| $\text{LiNi}_{0.8}\text{Co}_{0.15}\text{Al}_{0.05}\text{O}_2^2$              | 203.1                   | 180                       | 200   | 160.3     | 93.3%    | 171.8                      | N/A   | N/A   | N/A                                   | N/A    | N/A   | N/A      |
| $\text{LiNi}_{0.8}\text{Co}_{0.15}\text{Al}_{0.05}\text{O}_2^3$              | 190                     | 170                       | 50    | 169.5     | 98%      | 173                        | N/A   | N/A   | 55                                    | 170    | 50    | 80%      |
| $\text{LiNi}_{0.81}\text{Co}_{0.10}\text{Al}_{0.09}\text{O}_2^4$             | 199                     | 200                       | 200   | 147.9     | 85%      | 176                        | 161   | 155   | 60                                    | 200    | 200   | 59%      |
| $\text{LiNi}_{0.85}\text{Co}_{0.10}\text{Al}_{0.05}\text{O}_2^4$             | 207                     | N/A                       | N/A   | N/A       | N/A      | 175                        | 158   | 145   | 60                                    | 200    | 200   | 53%      |
| $\text{LiNi}_{0.89}\text{Co}_{0.11}\text{O}_2^4$                             | 200                     | 200                       | 200   | 149.3     | 79%      | 169                        | 148   | 128   | 60                                    | 200    | 200   | 37%      |
| $\text{LiNi}_{0.9}\text{Co}_{0.1}\text{O}_2^5$                               | 218                     | 25                        | 15    | 192       | 88.1%    | N/A                        | N/A   | N/A   | N/A                                   | N/A    | N/A   | N/A      |
| $\text{LiNi}_{0.9}\text{Co}_{0.05}(\text{Mg},\text{Mn})_{0.025}\text{O}_2^6$ | 201.0                   | 180                       | 50    | 172.5     | 91.9%    | 187.6                      | N/A   | N/A   | N/A                                   | N/A    | N/A   | N/A      |
| $\text{LiNi}_{0.9}\text{Co}_{0.07}\text{Al}_{0.03}\text{O}_2$ this work      |                         | 180                       | 100   | 179.8     | 93.1%    |                            |       |       | 45                                    | 180    | 100   | 92.8%    |
|                                                                              | 236.0                   | 180                       | 200   | 169.2     | 87.6%    | 193.1                      | 168.5 | 140.8 | 55                                    | 180    | 100   | 83.8%    |
|                                                                              |                         | 360                       | 200   | 155.3     | 86.3%    |                            |       |       | 60                                    | 180    | 100   | 70.4%    |

The calcination temperature and molar ratio of Li/M (M=Ni, Co, Al) play an important role in phase structure of  $\text{LiNi}_{0.9}\text{Co}_{0.07}\text{Al}_{0.03}\text{O}_2$  materials and the  $\text{Ni}^{2+}/\text{Li}^{+}$  mixing especially. Thus, the calcination temperature is firstly optimized among the 650, 700, 750, and 800 °C with molar ratio of Li/M=1.05. The sample calcined at 700 °C exhibits the highest value of  $I(003)/I(104)$  and better hexagonal ordering as compared to the other three samples, and possesses fine spherical particles (Fig. S1, Fig. S2, and Table

S2). Thus, the optimal calcination temperature is considered as 700 °C for this component. Furthermore, the molar ratio of Li/M is further optimized among 1.0, 1.02, 1.05, and 1.1, and calcinated at the optimal calcination temperature at 700 °C. As can be seen that the sample with Li/M=1.02 possesses the least degree of Ni<sup>2+</sup>/Li<sup>+</sup> mixing and integrated layered structure (Fig. S2 and Table S2). Moreover, the morphology of sample with Li/M=1.02 shows smooth surface and clear grain boundaries as compared with other three samples, implying that few of residual lithium can be observed on the surface. The chemical composition is measured by ICP-AES (Table S3). The sample with Li/M=1.02 is closed to the theoretical component of LiNi<sub>0.9</sub>Co<sub>0.07</sub>Al<sub>0.03</sub>O<sub>2</sub>. Based on the above results, the optimal Li/M is 1.02 for this component.

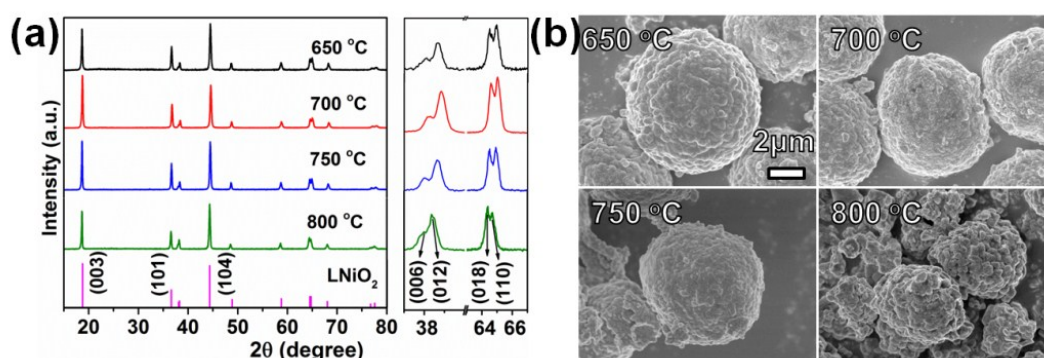

**Fig. S1.** (a)XRD patterns and (b) SEM images of samples with various calcination temperatures.

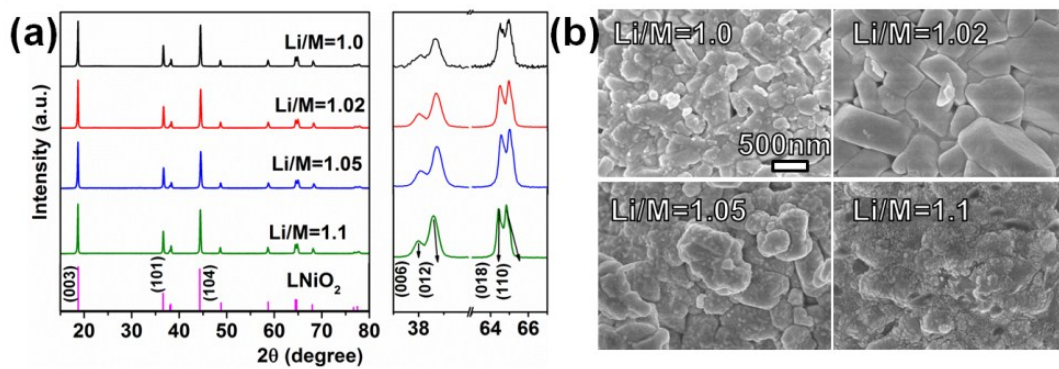

**Fig. S2.** (a) XRD patterns and (b) SEM images of samples with various molar ratio of Li/M.

**Table S2.** Structural parameters,  $I(003)/I(104)$ , and R-factor of samples synthesized under different reaction conditions

|                 | Li/M=1.05 |           |           |           | 700 °C    |           |           |
|-----------------|-----------|-----------|-----------|-----------|-----------|-----------|-----------|
|                 | 650°C     | 700°C     | 750°C     | 800°C     | Li/M=1.0  | Li/M=1.02 | Li/M=1.1  |
| $a$ (Å)         | 2.870(4)  | 2.874(9)  | 2.870(7)  | 2.879(2)  | 2.873(2)  | 2.871(5)  | 2.873(6)  |
| $c$ (Å)         | 14.175(9) | 14.212(4) | 14.189(9) | 14.199(5) | 14.190(5) | 14.214(5) | 14.195(1) |
| $I(003)/I(104)$ | 0.91      | 1.22      | 1.08      | 0.84      | 1.1       | 1.26      | 1.13      |
| R-factor        | 0.52      | 0.49      | 0.46      | 0.67      | 0.51      | 0.44      | 0.53      |

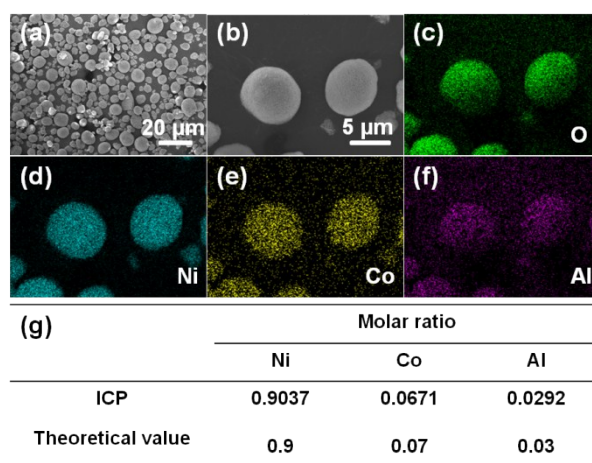

**Fig. S3.** a,b) SEM images, c-f) EDS mappings, and g) atomic ratio of Ni, Co, and Al of the as-prepared  $\text{Ni}_{0.9}\text{Co}_{0.07}\text{Al}_{0.03}(\text{OH})_2$  precursor.

**Table S3.** Chemical composition analysis of samples with various molar ratio of Li/M.

| Composition | Molar ratio |        |        |        |
|-------------|-------------|--------|--------|--------|
|             | Li          | Ni     | Co     | Al     |
| Li/M=1.0    | 0.976       | 0.9033 | 0.0674 | 0.0293 |
| Li/M=1.02   | 1.009       | 0.9030 | 0.0675 | 0.0295 |
| Li/M=1.05   | 1.034       | 0.9035 | 0.0671 | 0.0294 |
| Li/M=1.1    | 1.085       | 0.9030 | 0.0673 | 0.0297 |

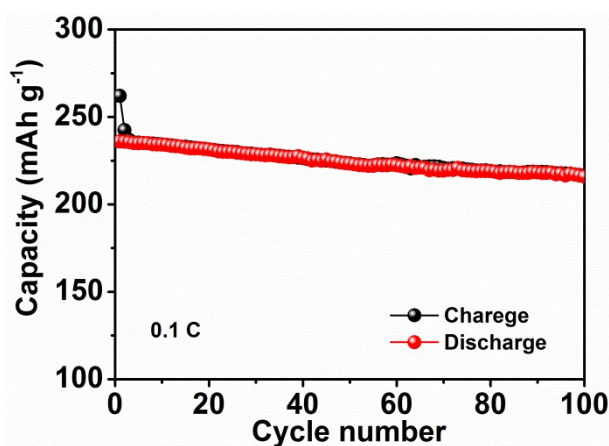

**Fig. S4.** Electrochemical performance of  $\text{LiNi}_{0.9}\text{Co}_{0.07}\text{Al}_{0.03}\text{O}_2$  at 0.1 C for 100 cycles.

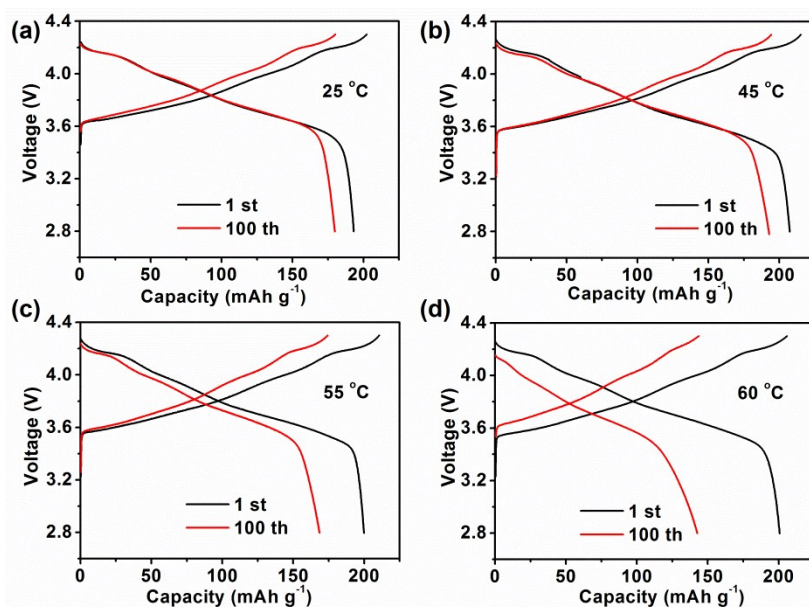

**Fig. S5.** Charge and discharge profiles at selected cycles at a rate of 1 C at various temperature.

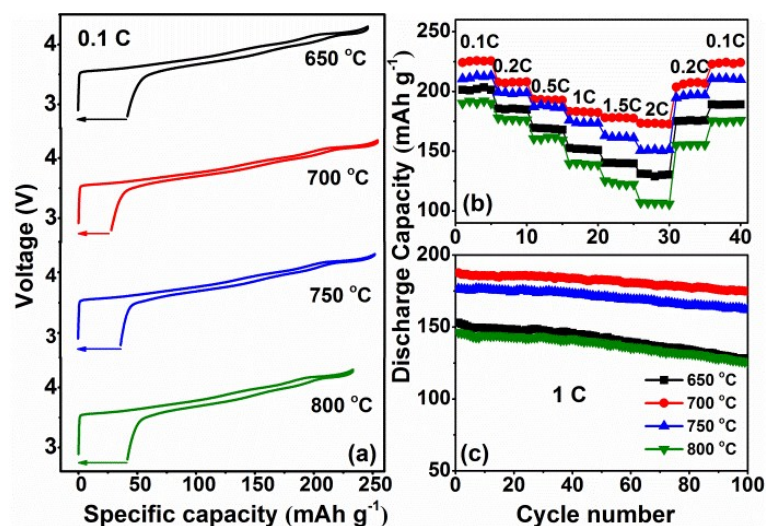

**Fig. S6.** Electrochemical performance of samples at various calcination temperatures.

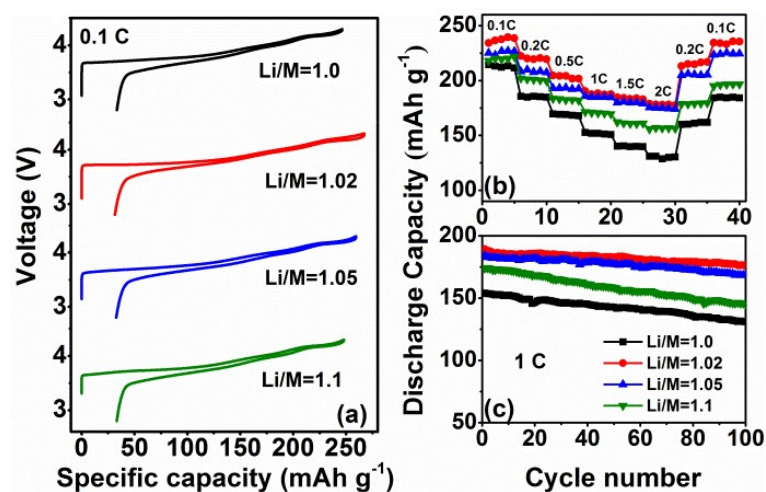

**Fig. S7.** Electrochemical performance of samples at various molar ratios of Li/M.

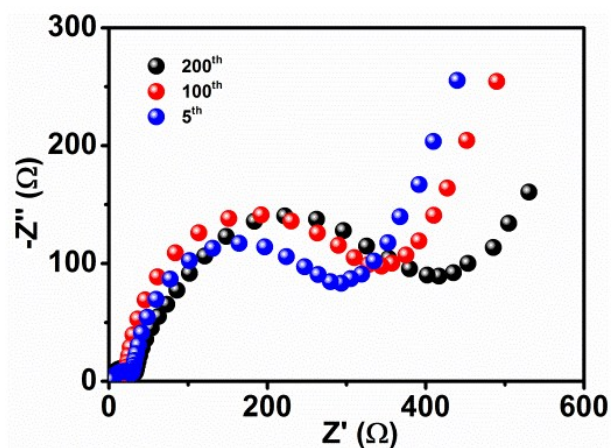

**Fig. S8.** Electrochemical impedance spectra of LiNi<sub>0.9</sub>Co<sub>0.07</sub>Al<sub>0.03</sub>O<sub>2</sub> at selected cycles at a rate of 1 C at 25 °C.



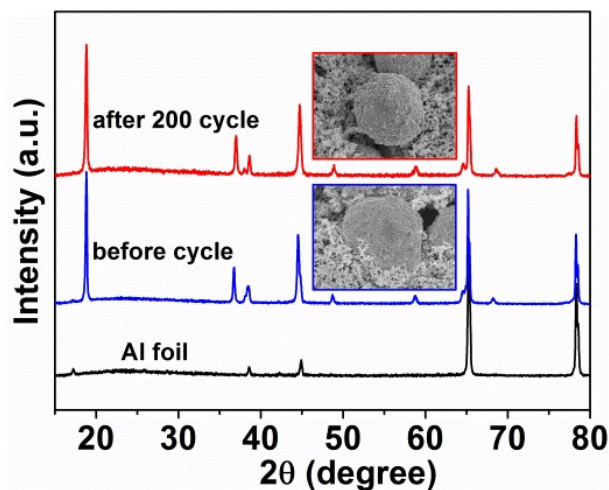

**Fig. S9.** XRD patterns and SEM images (inset) of  $\text{LiNi}_{0.9}\text{Co}_{0.07}\text{Al}_{0.03}\text{O}_2$  before cycle and after 200 cycles at a rate of 2 C.

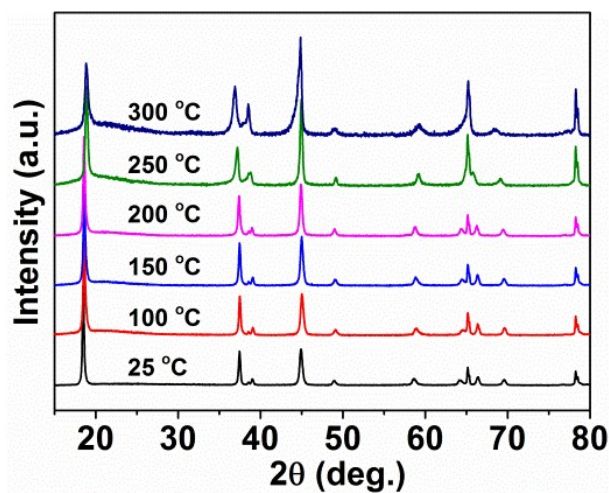

**Fig. S10.** Ex-situ XRD patterns of  $\text{LiNi}_{0.9}\text{Co}_{0.07}\text{Al}_{0.03}\text{O}_2$  charged at 4.3 V before and after heating at various temperatures.

**GITT test:** The GITT curves in range of 2.8-4.3 V at a current density of 0.1 C at the third cycle are shown in Fig. S11. The cell is charged for 10 min followed by a relaxation time interval of 40 min, and this procedure is repeated until the voltage reached to 4.3 V. A typical GITT titration step at around 3.85 V with labeling parameters is presented as Fig. S12. Based on Fick's second law of diffusion and followed assumption and simplification, the  $D_{\text{Li}^+}$  can be calculated by the simplified Equation (1).<sup>[7]</sup>

$$D_{Li^+} = \frac{4 \left( \frac{m_B V_M}{M_B A} \right)^2 \left( \frac{\Delta E_S}{\tau (dE_\tau / d\sqrt{\tau})} \right)^2}{\pi} \quad (\tau \ll L^2 / D_{Li^+}) \quad (1)$$

where  $m_B$  and  $M_B$  are the mass and molecular weight of  $LiNi_{0.9}Co_{0.07}Al_{0.03}O_2$  cathode material, respectively.  $V_M$ , the molar volume of  $LiNi_{0.9}Co_{0.07}Al_{0.03}O_2$ , is calculated from the crystal structure data and equal to  $(N_A \times V_{unit})/3$ , where  $N_A$  is Avogadro constant, and  $V_{unit}$  is the volume of unit cell.  $A$  is the total contact area between the cathode material and electrolyte.  $L$  is the average thickness of the electrode. Detailed definition of  $\tau$ ,  $\Delta E_S$ , and  $\Delta E_\tau$  is demonstrated in Fig. S10. Furthermore, when the cell voltage during titration is linearly proportional to  $\tau^{1/2}$  (Fig. S13), the Equation (1) can be further simplified as Equation (2).<sup>[7]</sup>

$$D_{Li^+} = \frac{4 \left( \frac{m_B V_M}{M_B A} \right)^2 \left( \frac{\Delta E_S}{\Delta E_\tau} \right)^2}{\pi \tau} \quad (2)$$

In this case, the BET surface area of the compound electrode ( $3.98 \text{ m}^2 \text{ g}^{-1}$ , Fig. S14, Supporting Information) is used as the total contact area rather than the geometric area of the electrode ( $0.785 \text{ cm}^2$ ), because of the electrolyte can fully soak the cathode materials by permeating the conductive additive and binder.<sup>[8]</sup>

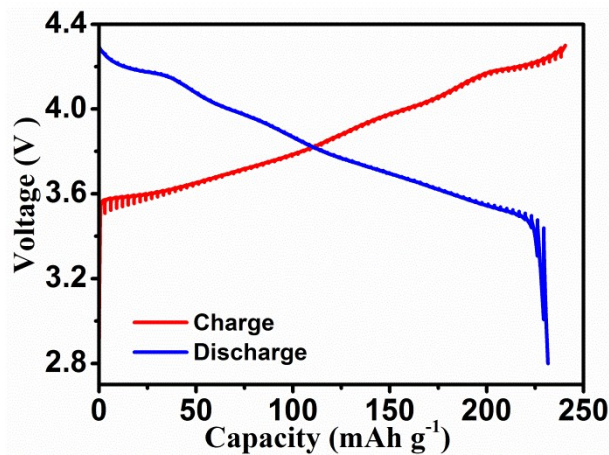

**Fig. S11.** The GITT curves of  $LiNi_{0.9}Co_{0.07}Al_{0.03}O_2$  during the third cycle in the voltage

range of 2.8-4.3 V at a rate of 0.1 C and at 25 °C.

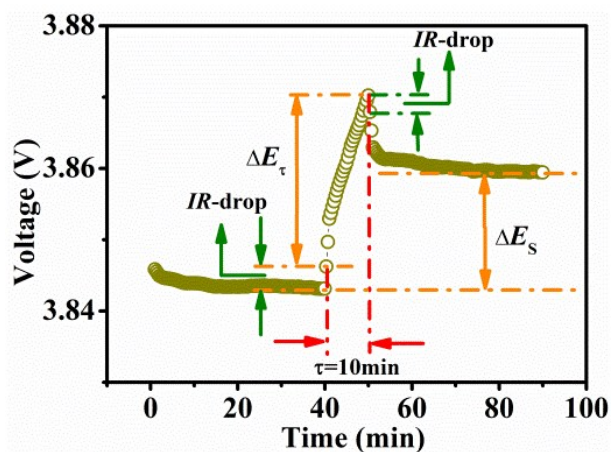

**Fig. S12.** Scheme for the voltage response of a charge pulse at around 3.85 V in the GITT experiment with labeling of parameters.

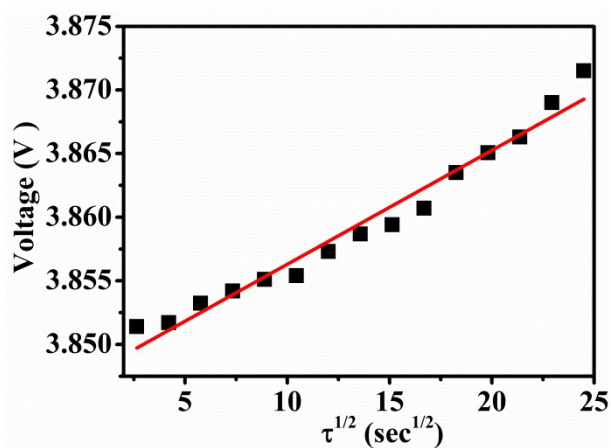

**Fig. S13.** Plot of voltage against  $\tau^{1/2}$  to show the linear fit.

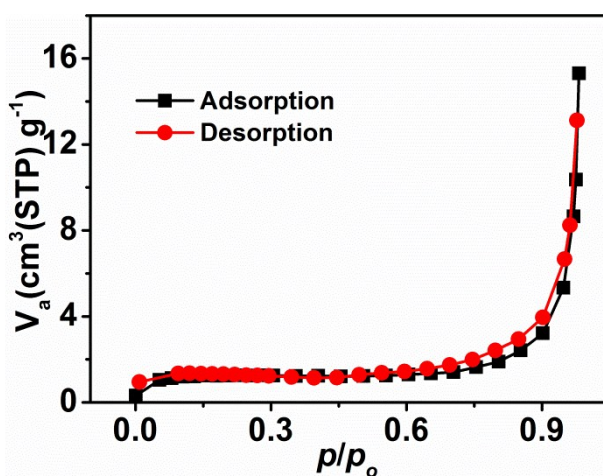

**Fig. S14.** N<sub>2</sub> adsorption and desorption isotherm of the composite electrode.



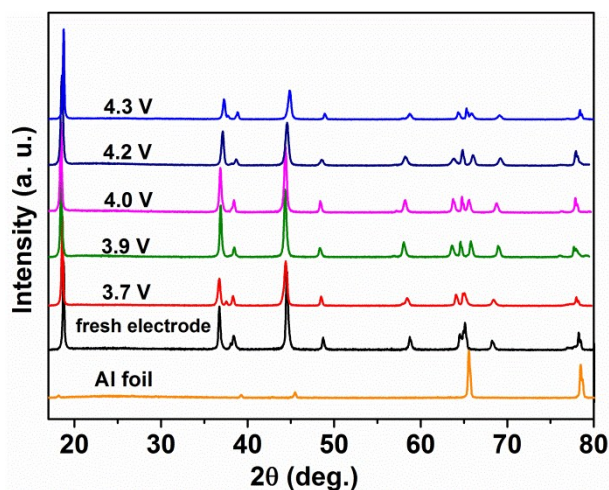

**Fig. S15.** Ex-situ XRD patterns of as-prepared  $\text{LiNi}_{0.9}\text{Co}_{0.07}\text{Al}_{0.03}\text{O}_2$  at different charged state during the third charge process at a rate of 0.1 C and at 25 °C.

**Table S4.** The lattice patterns of  $\text{LiNi}_{0.9}\text{Co}_{0.07}\text{Al}_{0.03}\text{O}_2$  at different stage of charging.

|   | pristine | 3.7 V  | 3.9 V   | 4.0 V   | 4.2 V   | 4.2 V   |
|---|----------|--------|---------|---------|---------|---------|
| a | 2.8659   | 2.8752 | 2.8803  | 2.8905  | 2.8925  | 2.8938  |
| c | 14.2100  | 14.375 | 14.4460 | 14.4504 | 14.1929 | 14.1794 |

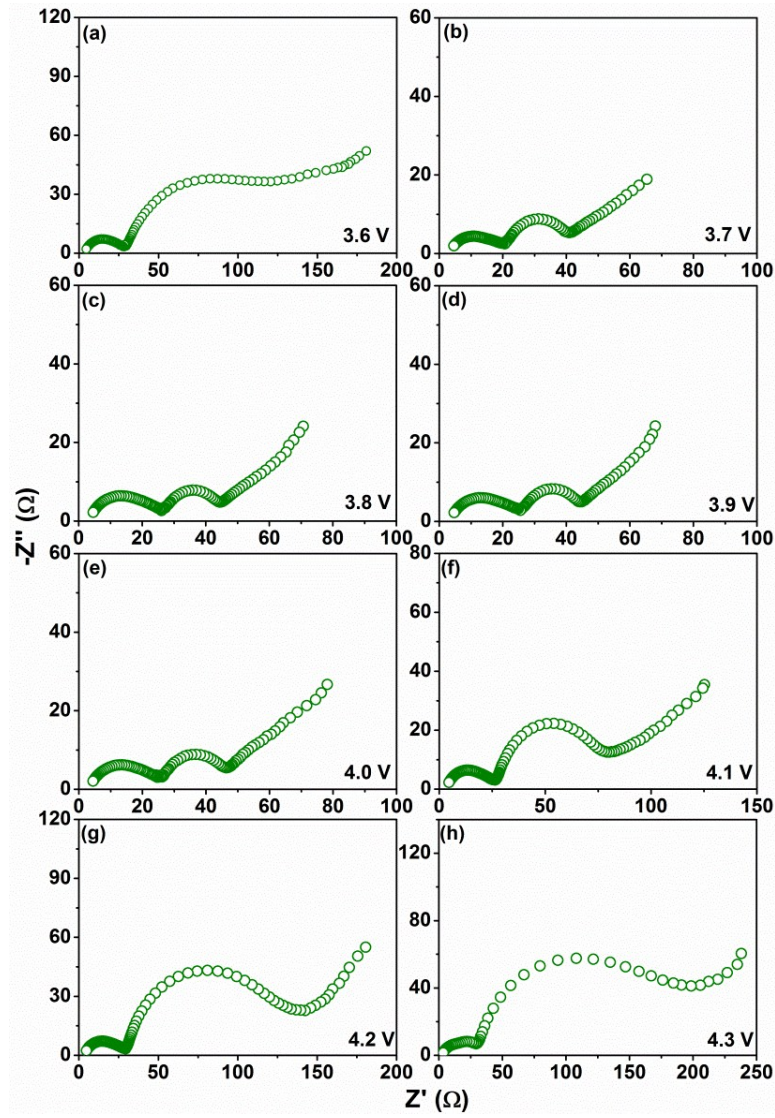

**Fig. S16.** EIS of  $\text{LiNi}_{0.9}\text{Co}_{0.07}\text{Al}_{0.03}\text{O}_2$  at different stage of charge during the third cycle.

**Table S5.** The comparisons of lithium and electronic conductivity between the reported Ni-based cathode materials and as-prepared  $\text{LiNi}_{0.9}\text{Co}_{0.07}\text{Al}_{0.03}\text{O}_2$ .

|                                                                                  | Morphology | Type of electrode | $D_{\text{Li}^+}$ ( $\text{cm}^2 \text{s}^{-1}$ ) | electron conductivity ( $\text{S cm}^{-1}$ ) | Technique used for test $D_{\text{Li}^+}$ |
|----------------------------------------------------------------------------------|------------|-------------------|---------------------------------------------------|----------------------------------------------|-------------------------------------------|
| $\text{LiNi}_{0.8}\text{Co}_{0.15}\text{Al}_{0.05}\text{O}_2^1$                  | microrods  | composite         | $3.89 \cdot 10^{-10}$                             | N/A                                          | EIS                                       |
| $\text{LiNi}_{0.8}\text{Co}_{0.15}\text{Al}_{0.05}\text{O}_2^1$                  | spherical  | composite         | $3.72 \cdot 10^{-11}$                             | N/A                                          | EIS                                       |
| $\text{LiNi}_{0.8}\text{Co}_{0.15}\text{Al}_{0.05}\text{O}_2^3$                  | spherical  | composite         | $8.3 \pm 0.9 \cdot 10^{-16}$                      | N/A                                          | EIS                                       |
| $\text{LiNi}_{0.8}\text{Co}_{0.15}\text{Al}_{0.05}\text{O}_2^9$                  | spherical  | composite         | $\sim 10^{-11}$                                   | N/A                                          | EIS                                       |
| $\text{LiNi}_{0.8}\text{Co}_{0.15}\text{Al}_{0.05}\text{O}_2^{10}$               | spherical  | pure NCA          | $\sim 3 \cdot 10^{-11}$                           | $\sim 10^{-4}$                               | AC                                        |
|                                                                                  |            |                   | $\sim 2 \cdot 10^{-11}$                           |                                              | DC                                        |
|                                                                                  |            |                   | $\sim 4 \cdot 10^{-11}$                           |                                              | Depolarization                            |
| $\text{LiNi}_{0.9}\text{Co}_{0.07}\text{Al}_{0.03}\text{O}_2^{\text{this work}}$ | spherical  | composite         | $\sim 7 \cdot 10^{-10}$                           | $\sim 5.4 \cdot 10^{-4}$                     | GITT                                      |

## LIBs full cells

The conductive graphite (KS<sub>6</sub>) anode was prepared by blending 90 wt% KS6 active materials and 10 wt% PVdF as the binder in N-methyl-2-pyrrolidone. The obtained slurry was pasted onto copper foil and dried at 80 °C for 12 h in vacuum. The anode was cut into pellets with the diameter of 12 mm. Then, the electrode pellets were tried to press under various pressure (0, 5, 10, and 15 MPa) for 5 s so as to achieve better performance. Fig. S17 shows that when pressed under 10 MPa, the KS<sub>6</sub> exhibited the best electrochemical performance. For full-cell demonstration, KS<sub>6</sub> anode was precycled in half-cells between 0.01 to 1.0 V and disassembled at charge state, then reassembled with fresh LiNi<sub>0.9</sub>Co<sub>0.07</sub>Al<sub>0.03</sub>O<sub>2</sub> cathode into full-cells. The ratio of LiNi<sub>0.9</sub>Co<sub>0.07</sub>Al<sub>0.03</sub>O<sub>2</sub>/ KS<sub>6</sub> is about ~1.8.

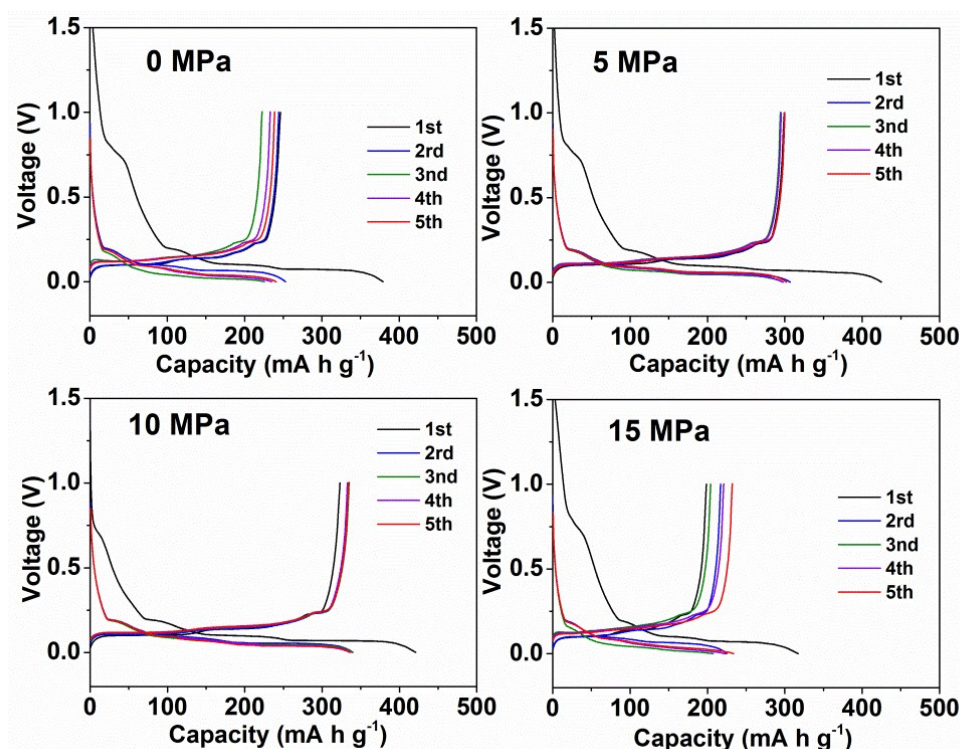

**Fig. S17.** Charge and discharge profiles of KS<sub>6</sub> in half-cells under various pressures and at current density of 18 mA g<sup>-1</sup>.

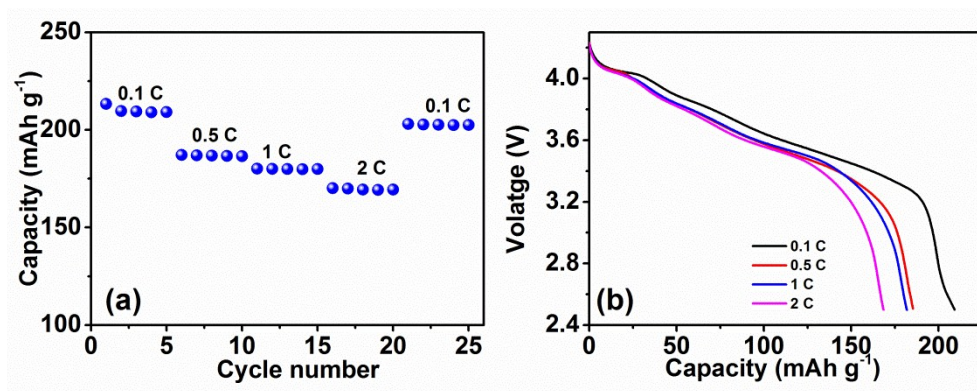

**Fig. S18.** (a) rate performance and (b) charge and discharge profiles at various rates of  $\text{LiNi}_{0.9}\text{Co}_{0.07}\text{Al}_{0.03}\text{O}_2/\text{KS}_6$  full cell.

- [1] N. T. Wu, H. Wu, W. Yuan, S. J. Liu, J. Y. Liao, Y. Zhang, *J. Mater. Chem. A*, **2015**, 3, 13648.
- [2] H. B. Xie, K. Du, G. R. Hu, J. G. Duan, Z. D. Peng, Z. Z. Zhang, Y. B. Cao, *J. Mater. Chem. A*, **2015**, 3, 20236.
- [3] T.J. Park, J. B. Lim, J.T. Son, *Bull. Korean Chem. Soc.*, **2014**, 35, 357.
- [4] M. Jo, M. Noh, P. Oh, Y. Kim, J. Cho, *Adv. Energy Mater.*, **2014**, 4, 1301583.
- [5] C.W. Wang, X.L. Ma, J.G. Cheng, X.Y. Cao, J.T. Sun, Y.H. Zhou, *Mater. Lett.*, **2007**, 61, 556.
- [6] D.C. Jiang, L. Zhao, Y.B. Shao, D.L. Wang, *RSC Adv.*, **2015**, 5, 40779.
- [7] X. H. Rui, N. Yesibolati, S. R. Li, C. C. Yuan, C. H. Chen, *Solid State Ionics*, **2011**, 187, 58.
- [8] J.M. Zheng, W. Shi, M. Gu, J. Xiao, P.J. Zuo, C.M. Wang, J.G. Zhang, *J. Electrochem. Soc.*, **2013**, 160, A2212.
- [9] D.P. Abraham, S. Kawauchi, D.W. Dees, *Electrochim. Acta*, **2008**, 53, 2121.
- [10] R. Amin, D.B. Ravnsbæk, Y.M. Chiang, *J. Electrochem. Soc.*, **2015**, 162, A1163.
